# Supplementary material for: Diisocyanates influence models of atopic dermatitis through direct activation of TRPA1
Source: PubMed Central journal article supplement (PMC9987805; doi:10.1371/journal.pone.0282569), 2023-03-06

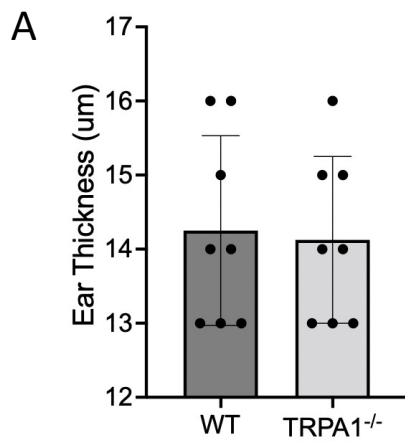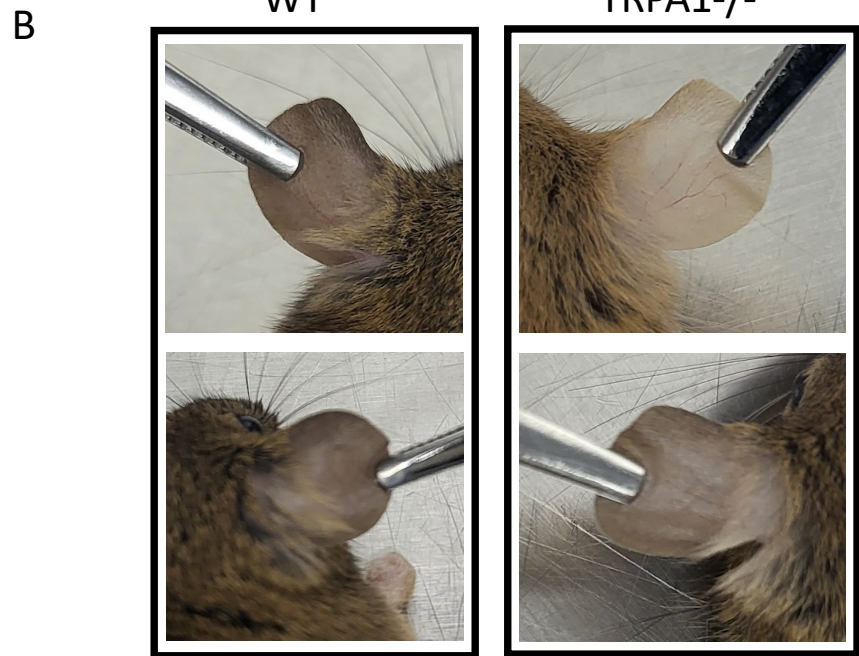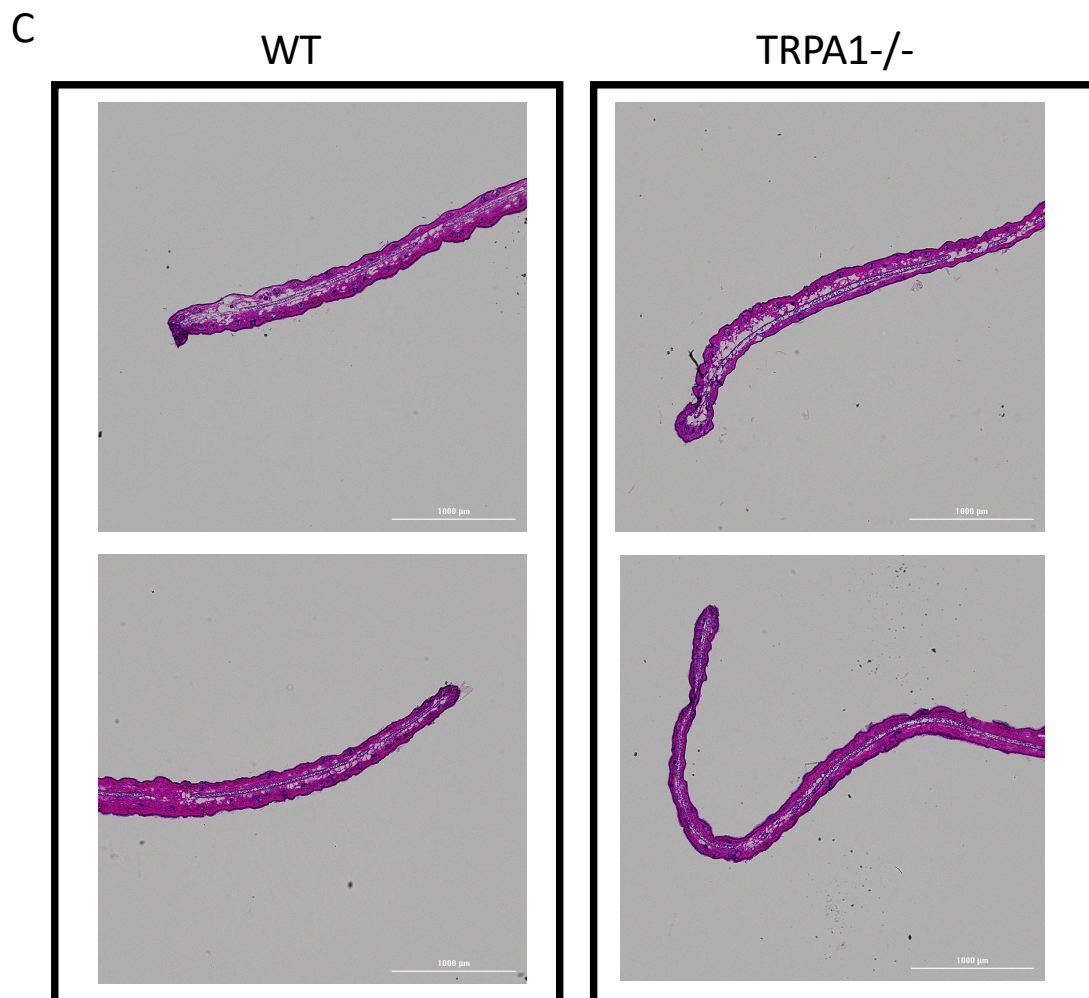

Supplement: pone.0282569.s002.pdf [file pone.0282569.s002.pdf]
